# Supplementary material for: Effect of tiotropium on night-time awakening and daily rescue medication use in patients with COPD
Source: Springer Nature journal article supplement (doi:10.1186/s12931-016-0340-9), 2016-03-12
Supplement: MOESM1 [file 9759924]

**Table S1 Energy and fatigue questionnaire.** Patients were asked to choose one option in each question that best described how they felt

|                                                                                  |
|----------------------------------------------------------------------------------|
| How would you rate your <u>energy level</u> these days?                          |
| 1 = Very good                                                                    |
| 2 = Good                                                                         |
| 3 = Fair                                                                         |
| 4 = Poor                                                                         |
| 5 = Very poor                                                                    |
| How would you rate your <u>level of fatigue</u> these days?                      |
| 1 = Very severe                                                                  |
| 2 = Severe                                                                       |
| 3 = Moderate                                                                     |
| 4 = Mild                                                                         |
| 5 = Very mild                                                                    |
| 6 = No fatigue                                                                   |
| How would you rate the <u>severity of your respiratory condition</u> these days? |
| 1 = Very severe                                                                  |
| 2 = Severe                                                                       |
| 3 = Moderate                                                                     |
| 4 = Mild                                                                         |
| 5 = Very mild                                                                    |
| 6 = No problem at all                                                            |
