# Supplementary material for: Effect of tiotropium on night-time awakening and daily rescue medication use in patients with COPD
Source: Springer Nature journal article supplement (doi:10.1186/s12931-016-0340-9), 2016-03-12

**Figure S1. Adjusted weekly mean rescue medication doses/24 hours.** A dose of rescue medication use was defined as one or two puffs of albuterol. Data are mean  $\pm$  standard error. The means are adjusted for center effects and baseline. The overall mean is the average over the 13 weekly means. \*\*\*p < 0.001 for tiotropium versus placebo.

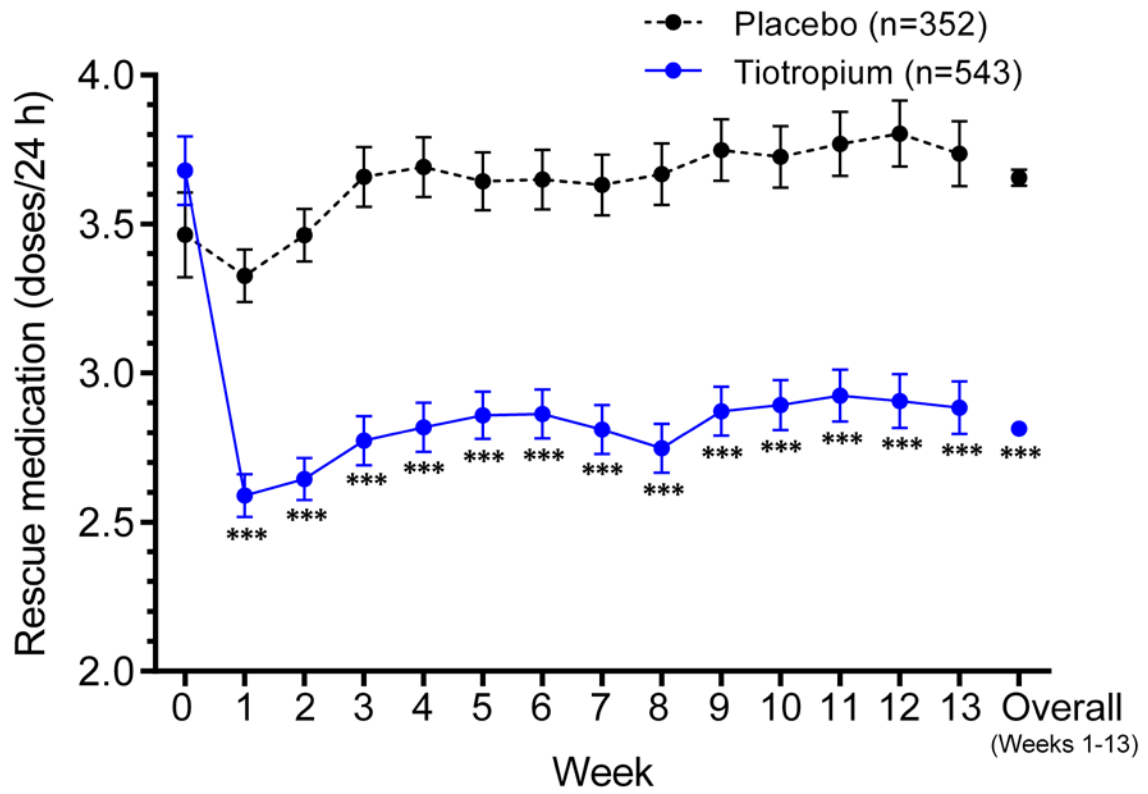

Supplement: MOESM2 [file 9759924]
