# Supplementary material for: Effect of tiotropium on night-time awakening and daily rescue medication use in patients with COPD
Source: Springer Nature journal article supplement (doi:10.1186/s12931-016-0340-9), 2016-03-12

**Figure S2 36-Item Short-Form Health Survey (SF-36) assessed at baseline and Week 13 (Day 92).** Data are adjusted mean  $\pm$  standard error. The means are adjusted for center effects and baseline. A score of zero indicates worst health and a score of 100 indicates best health. \* $p < 0.05$ , \*\* $p < 0.01$  tiotropium versus placebo at Week 13.

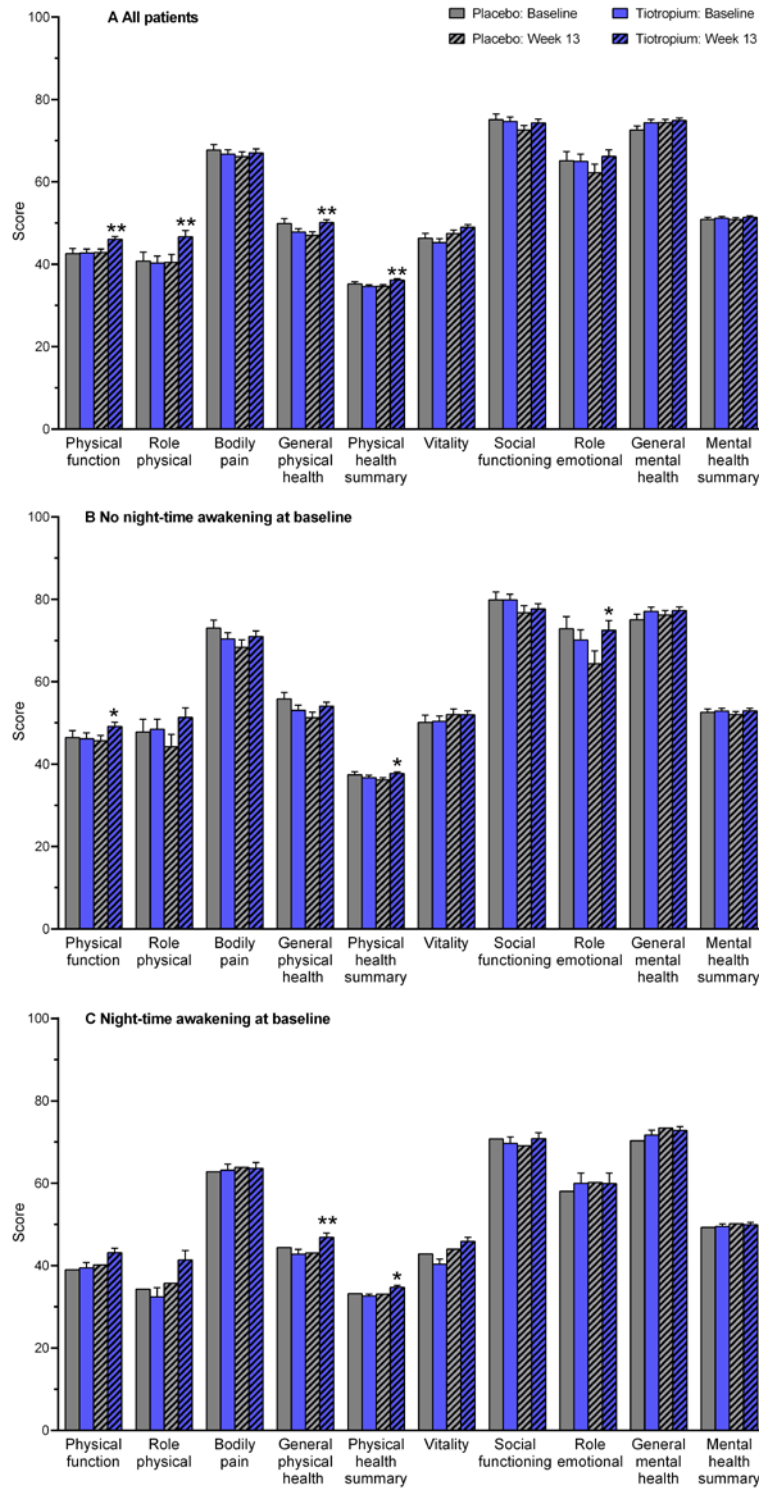

Supplement: MOESM3 [file 9759924]
