# Supplementary material for: Effect of tiotropium on night-time awakening and daily rescue medication use in patients with COPD
Source: Springer Nature journal article supplement (doi:10.1186/s12931-016-0340-9), 2016-03-12
Supplement: MOESM4 [file 9759924]

**Table S2 Pearson’s correlation coefficients: night-time awakening scores and 36-item Short-Form Health Survey (SF-36) scores at baseline, Week 13, and overall (Weeks 1–13)**

| Correlation with night-time awakening <sup>a,b</sup> |                      | Tiotropium |           | Placebo |           |
|------------------------------------------------------|----------------------|------------|-----------|---------|-----------|
|                                                      |                      | n          | r         | n       | r         |
| Physical Function                                    | Baseline             | 520        | −0.225*** | 328     | −0.286*** |
|                                                      | Week 13              | 520        | −0.175*** | 328     | −0.285*** |
|                                                      | Overall (Weeks 1–13) | 520        | −0.216*** | 328     | −0.269*** |
| Role Physical                                        | Baseline             | 519        | −0.216*** | 328     | −0.292*** |
|                                                      | Week 13              | 519        | −0.181*** | 328     | −0.298*** |
|                                                      | Overall (Weeks 1–13) | 519        | −0.190*** | 328     | −0.226*** |
| Bodily Pain                                          | Baseline             | 520        | −0.258*** | 328     | −0.223*** |
|                                                      | Week 13              | 520        | −0.178*** | 328     | −0.215*** |
|                                                      | Overall (Weeks 1–13) | 520        | −0.193*** | 328     | −0.207*** |
| General Physical Health                              | Baseline             | 520        | −0.281*** | 327     | −0.326*** |
|                                                      | Week 13              | 520        | −0.194*** | 327     | −0.302*** |
|                                                      | Overall (Weeks 1–13) | 520        | −0.210*** | 327     | −0.296*** |
| Physical Health Summary <sup>c</sup>                 | Baseline             | 517        | −0.260*** | 325     | −0.320*** |
|                                                      | Week 13              | 517        | −0.178*** | 325     | −0.309*** |
|                                                      | Overall (Weeks 1–13) | 517        | −0.209*** | 325     | −0.284*** |
| Vitality                                             | Baseline             | 518        | −0.297*** | 327     | −0.278*** |
|                                                      | Week 13              | 518        | −0.183*** | 327     | −0.308*** |
|                                                      | Overall (Weeks 1–13) | 518        | −0.194*** | 327     | −0.265*** |
| Social Functioning                                   | Baseline             | 520        | −0.295*** | 328     | −0.237*** |
|                                                      | Week 13              | 520        | −0.233*** | 328     | −0.380*** |
|                                                      | Overall (Weeks 1–13) | 520        | −0.257*** | 328     | −0.329*** |
| Role Emotional                                       | Baseline             | 520        | −0.217*** | 327     | −0.213*** |
|                                                      | Week 13              | 520        | −0.208*** | 327     | −0.277*** |
|                                                      | Overall (Weeks 1–13) | 520        | −0.227*** | 327     | −0.206*** |
| General Mental Health                                | Baseline             | 518        | −0.285*** | 327     | −0.216*** |
|                                                      | Week 13              | 518        | −0.221*** | 327     | −0.208*** |
|                                                      | Overall (Weeks 1–13) | 518        | −0.235*** | 327     | −0.198*** |
| Mental Health Summary <sup>d</sup>                   | Baseline             | 517        | −0.278*** | 325     | −0.217*** |
|                                                      | Week 13              | 517        | −0.233*** | 325     | −0.281*** |
|                                                      | Overall (Weeks 1–13) | 517        | −0.238*** | 325     | −0.230*** |

\*\*\*p < 0.001.

<sup>a</sup>SF-36 domain scores for Week 13 were measured on Day 92.

<sup>b</sup>Overall night-time awakening (overall mean of Weeks 1–13 weekly means) versus SF-36 domain scores at Week 13 (Day 92).

<sup>c</sup>Summary of Physical Functioning, Role Physical, Bodily Pain, General Physical Health.

<sup>d</sup>Summary of Vitality, Social Functioning, Role Emotional and General Mental Health.
