# Supplementary material for: Effect of tiotropium on night-time awakening and daily rescue medication use in patients with COPD
Source: Springer Nature journal article supplement (doi:10.1186/s12931-016-0340-9), 2016-03-12
Supplement: MOESM5 [file 9759924]

### Energy–fatigue questionnaire results

At Week 13, energy and severity of condition scores were slightly more favorable for the tiotropium treatment group compared with the placebo group ( $p < 0.05$ ; Table S4); these small differences are of uncertain clinical significance.

For both tiotropium and placebo, at baseline, Week 13 and overall (Weeks 1–13), fatigue and severity of condition scores were negatively correlated with night-time awakening scores, while energy score was positively correlated with night-time awakening scores (all  $p < 0.001$ ; Table S5).

**Table S3 Adjusted mean energy–fatigue questionnaire scores assessed at baseline and Week 13 (Day 92)**

|                       |          | Tiotropium |                    | Placebo |                   |
|-----------------------|----------|------------|--------------------|---------|-------------------|
|                       |          | n          | Mean $\pm$ SE      | n       | Mean $\pm$ SE     |
| Energy                | Baseline | 533        | 2.972 $\pm$ 0.037  | 335     | 2.949 $\pm$ 0.048 |
|                       | Week 13  | 533        | 2.802 $\pm$ 0.031* | 335     | 2.929 $\pm$ 0.040 |
| Fatigue               | Baseline | 532        | 3.346 $\pm$ 0.042  | 335     | 3.325 $\pm$ 0.055 |
|                       | Week 13  | 532        | 3.415 $\pm$ 0.037  | 335     | 3.359 $\pm$ 0.046 |
| Severity of condition | Baseline | 531        | 2.957 $\pm$ 0.035  | 335     | 2.899 $\pm$ 0.047 |
|                       | Week 13  | 531        | 3.166 $\pm$ 0.033* | 335     | 3.046 $\pm$ 0.042 |

\* $p < 0.05$  for tiotropium versus placebo.

Data are mean  $\pm$  standard error.

The means are adjusted for center effects and baseline.

Energy: 1= very good; 2= good; 3 = fair; 4 = poor; and 5= very poor.

Fatigue: 1 = very severe; 2 = severe; 3 = moderate; 4 = mild; 5 = very mild; and 6 = no fatigue.

Severity of (respiratory) condition: 1 = very severe; 2 = severe; 3 = moderate; 4 = mild; 5 = very mild; and 6 = no problems at all.

**Table S4. Pearson’s correlation coefficients: night-time awakening scores and energy–fatigue questionnaire data**

| Correlation with night-time awakening <sup>a</sup> |                      | Tiotropium |           | Placebo |           |
|----------------------------------------------------|----------------------|------------|-----------|---------|-----------|
|                                                    |                      | n          | r         | n       | r         |
| Energy                                             | Baseline             | 533        | 0.270***  | 335     | 0.300***  |
|                                                    | Week 13              | 533        | 0.203***  | 335     | 0.355***  |
|                                                    | Overall (Weeks 1–13) | 533        | 0.217***  | 335     | 0.320***  |
| Fatigue                                            | Baseline             | 532        | −0.183*** | 335     | −0.260*** |
|                                                    | Week 13              | 532        | −0.174*** | 335     | −0.265*** |
|                                                    | Overall (Weeks 1–13) | 532        | −0.213*** | 335     | −0.242*** |
| Severity of condition                              | Baseline             | 531        | −0.180*** | 335     | −0.282*** |
|                                                    | Week 13              | 531        | −0.175*** | 335     | −0.198*** |
|                                                    | Overall (Weeks 1–13) | 531        | −0.190*** | 335     | −0.209*** |

\*\*\*p < 0.001.

<sup>a</sup>Health-related quality-of-life measures at Week 13 were measured on Day 92.
